1 **Spatially coordinated collective phosphorylation filters**  
2 **spatiotemporal noises for precise circadian**  
3 **timekeeping**

4

5 Seok Joo Chae<sup>1,2</sup>, Dae Wook Kim<sup>3</sup>, Seunggyu Lee<sup>2,4</sup>, Jae Kyoung Kim<sup>1,2,5,\*</sup>

6

7 <sup>1</sup> Department of Mathematical Sciences, Korea Advanced Institute of Science and  
8 Technology, Daejeon, 34141, Republic of Korea

9 <sup>2</sup> Biomedical Mathematics Group, Institute for Basic Science, Daejeon, 34126, Republic  
10 of Korea

11 <sup>3</sup> Department of Mathematics, University of Michigan, Ann Arbor, MI, 48109, USA

12 <sup>4</sup> Division of Applied Mathematical Science, Korea University, Sejong, 30019, Republic of  
13 Korea

14 <sup>5</sup> Lead Contact

15 \*Correspondence: [jaekkim@kaist.ac.kr](mailto:jaekkim@kaist.ac.kr)

16

## 17 Graphical Abstract

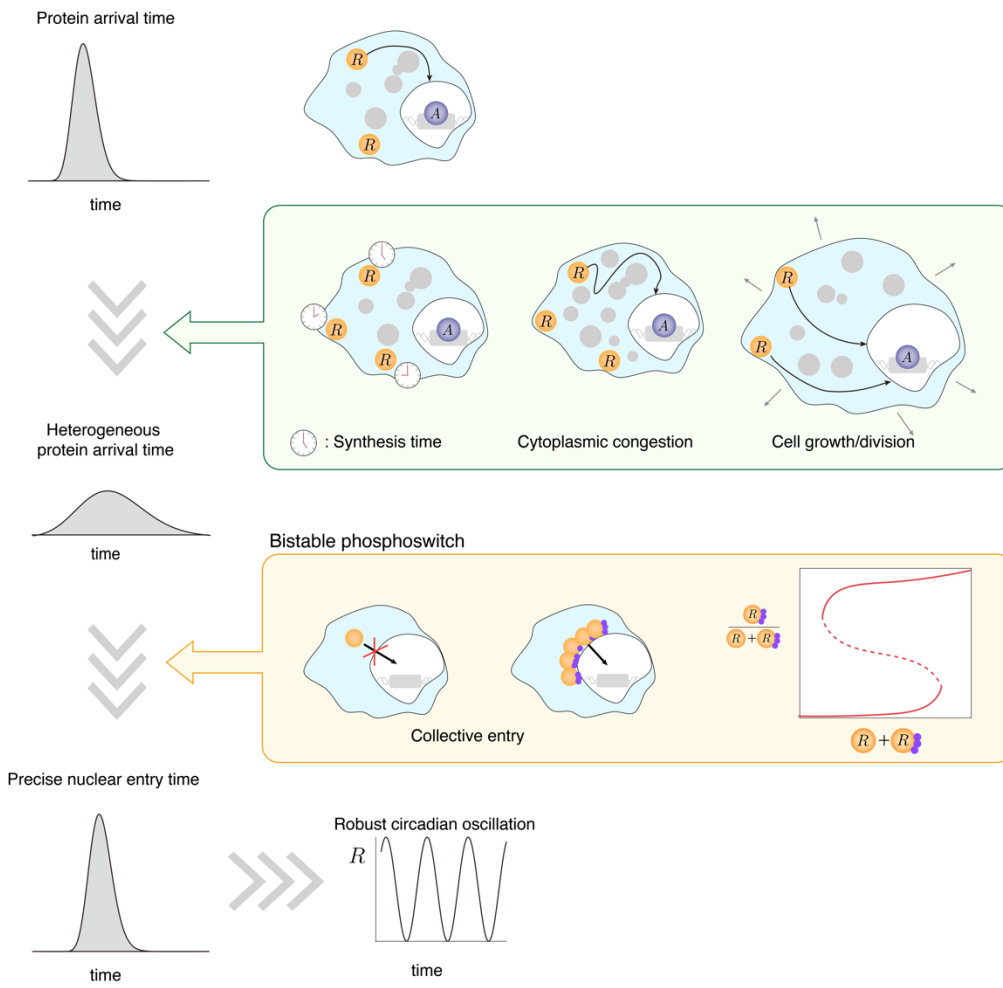

18

19

## 20 Highlights

- 21 • The time when PER protein arrives at the perinucleus is wide and keeps changing.
- 22 • A bistable phosphoswitch enables precise nuclear entry of PER protein.
- 23 • This leads to robust circadian rhythms when cell congestion level and size change.
- 24 • This describes how the circadian clock compensates for spatiotemporal noise.

25

## 26 **Summary**

27       The mammalian circadian (~24h) clock is based on a self-sustaining  
28 transcriptional-translational negative feedback loop (TTFL) centered around the PERIOD  
29 protein (PER), which is translated in the cytoplasm and then enters the nucleus to repress  
30 its own transcription at the right time of day. How such precise nucleus entry, critical for  
31 generating circadian rhythms, occurs is mysterious because thousands of PER molecules  
32 transit through crowded cytoplasm and arrive at the perinucleus across several hours.  
33 Here, we investigate this by developing a mathematical model that effectively describes  
34 the complex spatiotemporal dynamics of PER as a single random time delay. We find that  
35 the spatially coordinated bistable phosphoswitch of PER, which triggers the  
36 phosphorylation of accumulated PER at the perinucleus, can lead to the synchronous and  
37 precise nuclear entry of PER, and thus to precise transcriptional repression despite the  
38 heterogenous PER arrival times at the perinucleus. In particular, even when cell  
39 crowdedness, cell size, and transcriptional activator level change, and thus PER arrival  
40 times at the perinucleus are greatly perturbed, the bistable phosphoswitch allows the  
41 TTFL to maintain robust circadian rhythms. These results provide fundamental insight  
42 into how the circadian clock compensates for spatiotemporal noise from various  
43 intracellular sources.

44

## 45 **Introduction**

46       The mammalian circadian (~24h) clock is a self-sustained endogenous oscillator  
47 that relies on a transcriptional-translational negative feedback loop (TTFL), where the  
48 activator complex, BMAL1:CLOCK, promotes the transcription of *Per1/2* and *Cry1/2*

49 genes, and the PER:CRY complex inhibits BMAL1:CLOCK to close the loop<sup>1-6</sup>. In the  
50 TTFL, precise transcriptional repression (i.e., transcription being repressed at the right  
51 time of the day) of BMAL1:CLOCK by the PER complex is essential to generate circadian  
52 rhythms<sup>7-10</sup>.

53         However, obtaining such precise transcriptional repression is challenging because  
54 individual PER molecules are expected to arrive at the perinucleus at different times.  
55 Specifically, thousands of PER molecules transit through the crowded intracellular  
56 environment with organelles and macromolecules, leading to different travel times for  
57 each PER molecule. Moreover, since the cell size keeps changing due to cell growth and  
58 cell division, the travel distance of PER molecules to the perinucleus also keeps changing.  
59 The heterogeneity in the PER arrival time is further amplified as PER molecules are  
60 translated across several hours at different places<sup>8,11,12</sup>. Furthermore, the amount of  
61 activator proteins of the transcription (e.g., BMAL1), which promotes the production of  
62 PER protein, also exhibits a noisy fluctuation with daily changes<sup>13,14</sup>. As a result, the  
63 arrival time of PER molecules largely varies during a single day and exhibits daily  
64 variations. Interestingly, although thousands of PER molecules arrive at the perinucleus  
65 across several hours, they enter the nucleus during a narrow time window at the right  
66 time every day<sup>8</sup>, leading to transcriptional repression with precise timing, and thus to  
67 robust circadian rhythms. This indicates the existence of some mechanism that filters the  
68 heterogeneity in the protein arrival time.

69         This filtering mechanism has barely been investigated. Even the widely used  
70 mathematical models of the circadian clock assume that PER is homogeneously  
71 distributed in the cytoplasm, and thus they are not able to capture the cytoplasmic

72 trafficking of PER<sup>15-31</sup>. Notably, it has been shown that when the cytoplasmic trafficking  
73 of Hes1 molecules is incorporated into a mathematical model, the period of Hes1  
74 oscillation greatly changes (~three-fold)<sup>32</sup>. This indicates that the variability in the protein  
75 arrival time distribution should be filtered to generate stable rhythms. Previously, a  
76 potential filtering mechanism was proposed: If traveling molecules degrade quickly  
77 enough, molecules that spend a long time during cytoplasmic trafficking are degraded  
78 before they arrive at the perinucleus<sup>33</sup>, and thus only molecules traveling along optimal  
79 paths enter the nucleus without being degraded. Although this results in a narrow  
80 distribution of nuclear entry time, it requires an unrealistically short half-life of proteins (on  
81 the order of 1ms)<sup>34</sup>. Recently, a biologically feasible filtering mechanism, the spatially  
82 coordinated bistable phosphoswitch of PER, was suggested<sup>8</sup>. That is, when enough PER  
83 molecules are accumulated in the perinucleus, the bistable switch-like phosphorylation of  
84 PER is triggered. As a result, PER molecules at the perinucleus are synchronously  
85 phosphorylated, which is necessary for their nuclear entry, and enter the nucleus together.  
86 This allows thousands of PER molecules that arrive at the perinucleus at different times  
87 to enter the nucleus within a narrow time window. However, such filtering effect was  
88 investigated only under an ideal condition that does not include critical factors that affect  
89 the protein arrival time, such as variation in cytoplasmic congestion level, cell size, and  
90 activator amount.

91       Here, we investigated whether the bistable phosphoswitch of PER can filter the  
92 variability in its arrival time distribution under various noise sources: different cytoplasmic  
93 congestion levels, cell sizes, and activator amounts. Specifically, we developed a  
94 stochastic model simulating the TTFL of PER, where the PER travel time to the

95 perinucleus is described by a time delay distribution. Thus, changing the delay  
96 parameters allows us to effectively describe the change in the travel time due to the  
97 variation in cytoplasmic congestion and cell size. Using the framework, we found that the  
98 bistable phosphorylation of PER can effectively filter the heterogeneity in PER arrival time,  
99 resulting in precise repression timing and robust circadian rhythms. On the other hand,  
100 such filtering does not occur when PER phosphorylation occurs via conventional  
101 phosphorylation mechanisms, such as linear and ultrasensitive phosphorylations.  
102 Furthermore, by integrating our model with a previously measured BMAL1 time series in  
103 a single cell<sup>14</sup>, we showed that the bistable phosphorylation can lead to the precise timing  
104 of nuclear entry and robust circadian rhythms even under the large intra- and inter-daily  
105 variation in the amount of the activator proteins. Taken together, the bistable  
106 phosphoswitch for nuclear entry can filter heterogeneity in protein arrival time and lead to  
107 robust rhythms under diverse environments. Our approach sets the stage for  
108 systematically exploring how the circadian clock can filter diverse spatiotemporally  
109 generated noises in the cell to generate robust circadian rhythms.

110

## 111 **Results**

112 **Synchronous nuclear entry of PER molecules compensates for their**  
113 **spatiotemporal heterogeneity and leads to robust circadian rhythms.**

114 In the TTFI of the mammalian circadian clock, the translated PER protein at the  
115 cytoplasm ( $R_c$ ) approaches the perinucleus while it forms a complex with CRY proteins  
116 and CK1 $\delta/\epsilon$  ( $R_p$ ), and it is phosphorylated at multiple sites (Figure 1A)<sup>35-39</sup>. Then, the  
117 phosphorylated PER complex in the perinucleus ( $R'_p$ ) can enter the nucleus, where the

118 PER complex ( $R_n$ ) represses its own transcriptional activator ( $A$ ). As  $R_c$  transits through  
119 the cytoplasm crowded with organelles and macromolecules (Figure 1A, blue  
120 circles)<sup>8,11,12,40,41</sup>, the time  $R_c$  spends traveling to the perinucleus ( $\tau$ ) greatly differs, and  
121 thus the distribution of its arrival time at the perinucleus ( $t_p$ ) is wide (Figure 1B (i)). The  
122 distribution of  $t_p$  becomes even wider because PER proteins are translated at different  
123 places in the cytoplasm over several hours, leading to different travel distances and  
124 departure times, respectively<sup>8,11,12</sup>. Thus, if  $R'_p$  enters the nucleus in the order of arrival at  
125 the perinucleus, nuclear entry occurs within a wide time window (i.e., the distribution of  
126  $t_n$  is wide) (Figure 1B (ii), green), and thus transcriptional activity decreases gradually  
127 (Figure 1B (iii), green), weakening the circadian rhythms (Figure 1B (iv), green)<sup>42-44</sup>. Thus,  
128 to generate strong circadian rhythms, a mechanism narrowing the distribution of  $t_n$  is  
129 required (Figure 1B, red). Such a mechanism is expected to be based on the  
130 phosphorylation mechanism of  $R_p$  because  $R_p$  can enter the nucleus after  
131 phosphorylation<sup>3,35,45</sup>.

132

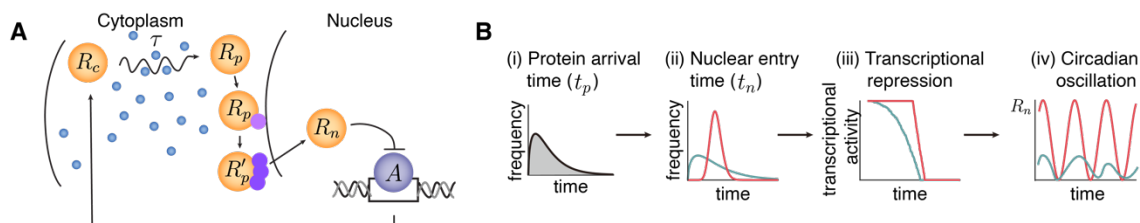

133

134 **Figure 1. Precise timing of repression is required to generate robust circadian**  
135 **rhythms. (A)** Schematic diagram of the circadian clock model. PER protein is  
136 synthesized in the cytoplasm ( $R_c$ ) and then it transits toward the perinucleus while it forms  
137 a complex with CRY and CK1 $\delta/\epsilon$  ( $R_p$ ), and it undergoes multisite phosphorylation. After  
138 being phosphorylated, PER complex in the perinucleus ( $R'_p$ ) can enter the nucleus ( $R_n$ ) to

139 inhibit its own transcriptional activator ( $A$ ). As  $R_c$  passes through cytoplasm crowded with  
140 obstacles such as organelles (blue circles), the time spent during the transit ( $\tau$ ) is  
141 heterogeneous among individual molecules. **(B)** This leads to a wide distribution of arrival  
142 time at the perinucleus ( $t_p$ ) of the PER proteins (i). Without a filtering mechanism, the  
143 distribution of nuclear entry time ( $t_n$ ) also becomes wide (green line, (ii)), leading to a  
144 gradual decline of transcriptional activity (green line, (iii)), and thus weak circadian  
145 rhythms (green line, (iv)). A filtering mechanism narrowing the distribution of  $t_n$  (red line,  
146 (ii)) is needed for sharp transcriptional repression (red line, (iii)), and thus robust circadian  
147 rhythms (red line, (iv)).  
148

149 **Bistable phosphorylation of PER is required to enter the nucleus in the circadian**  
150 **clock.**

151 PER protein has multiple CK1-dependent phosphorylation sites where the  
152 phosphorylation of these sites occurs in a cooperative manner<sup>8,46</sup>. As a result, the  
153 phosphorylation occurs collectively, i.e., the phosphorylation is affected by the local  
154 concentration of the PER complex (Figure 2A, red)<sup>8</sup>. Specifically, when the local  
155 concentration of the PER complex is lower than the switch-on threshold (Figure 2A, black  
156 triangle), phosphorylation does not occur. However, once the local concentration reaches  
157 the switch-on threshold, the majority of the PER complex is synchronously  
158 phosphorylated, resulting in a sharp increase in the phosphorylated fraction. Furthermore,  
159 the high fraction of phosphorylated PER complex persists for awhile, even after the local  
160 concentration decreases below the switch-on threshold, until it reaches the switch-off  
161 threshold (Figure 2A, gray triangle). To investigate the advantage of having such bistable  
162 phosphorylation of  $R_p$  in reducing the heterogeneity in the distribution of  $t_n$ , we compare  
163 it with the other typical phosphorylation mechanisms: ultrasensitive phosphorylation and  
164 linear phosphorylation. Ultrasensitive phosphorylation also has a switch-on threshold for  
165 synchronous phosphorylation, similar to bistable phosphorylation, but it does not have a



166 distinct switch-off threshold (Figure 2A, blue)<sup>44,47</sup>. Thus, the fraction of the  $R'_p$   
 167 monotonically increases as the total amount of PER in the perinucleus increases, with the  
 168 sigmoidal pattern having a steep increase near the switch-on threshold. In linear  
 169 phosphorylation, the fraction of the  $R'_p$  is constant (Figure 2A, green): only the fixed  
 170 portion of the PER complex is phosphorylated regardless of the local concentration of  
 171 PER complex.

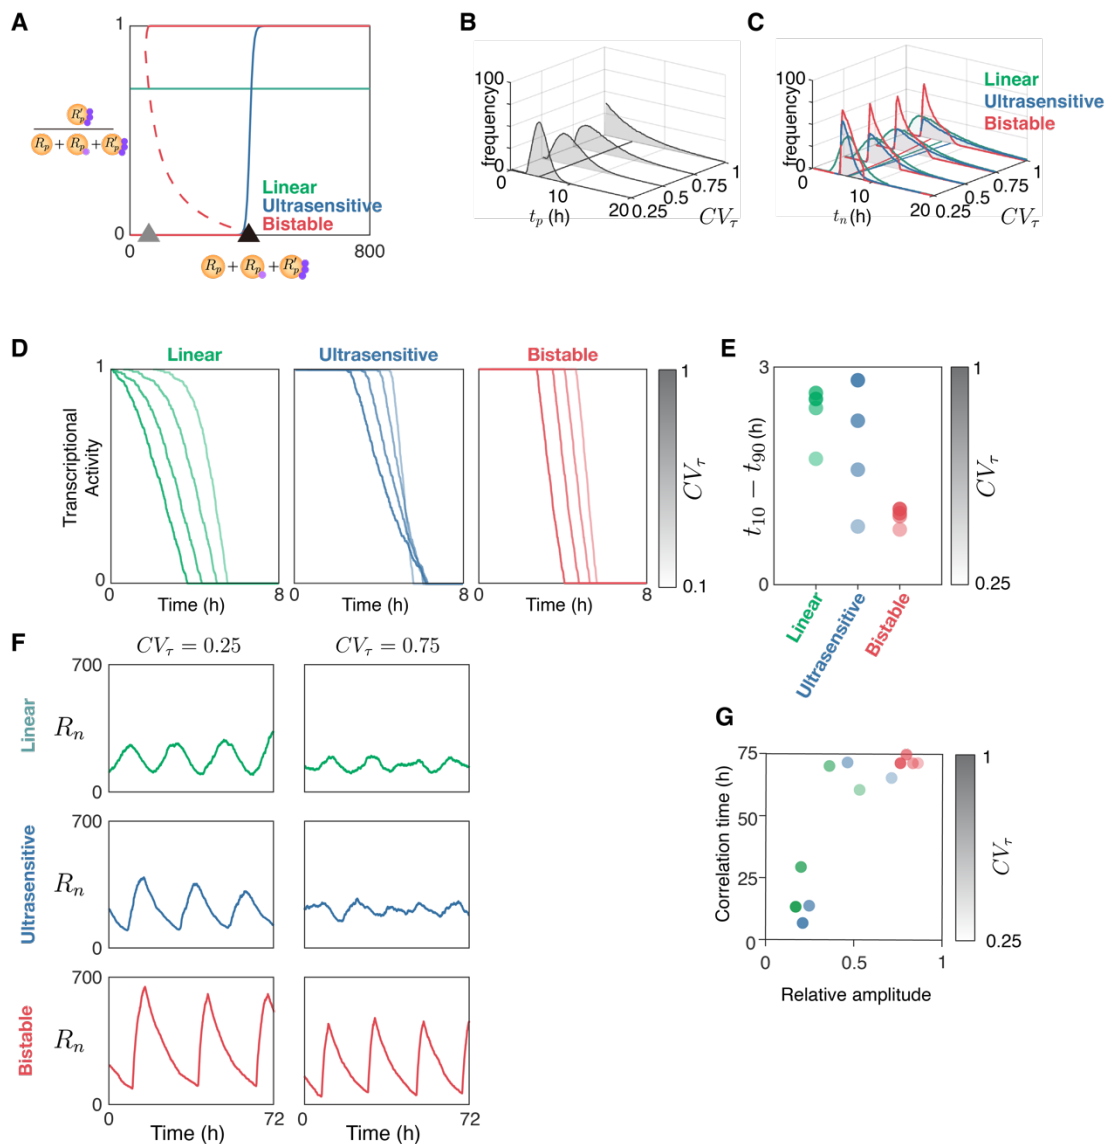

172

173 **Figure 2. Spatially coordinated collective phosphorylation of PER proteins leads to**  
174 **robust circadian oscillations in congested cells. (A)** Three representative  
175 phosphorylation mechanisms for nuclear entry. In linear phosphorylation, the fraction of  
176  $R'_p$  is the same regardless of the local concentration of the total PER complex in the  
177 perinucleus. In ultrasensitive and bistable phosphorylations, the fraction of  $R'_p$  steeply  
178 increases when the local concentration of the total PER complex reaches the switch-on  
179 threshold (black triangle). With bistable phosphorylation, the fraction of  $R'_p$  persists even  
180 when the local concentration of the total PER complex decreases below the switch-on  
181 threshold until the local concentration of the total PER complex reaches the switch-off  
182 threshold (gray triangle). **(B-C)** As the intracellular environment becomes more crowded  
183 (i.e.,  $CV_\tau$  increases), thousands of PER molecules arrive at the perinucleus within a wide  
184 time window ( $t_p$ ). As a result, the distribution of nuclear entry time ( $t_n$ ) also becomes  
185 significantly wider with linear (green) or ultrasensitive (blue) phosphorylation, but not with  
186 bistable phosphorylation (red). Here, the distributions were obtained from 200 repeated  
187 simulations. **(D)** As  $CV_\tau$  increases (light to dark colors), with linear and ultrasensitive  
188 phosphorylations, transcriptional activity decreases gradually (green and blue). In  
189 contrast, with bistable phosphorylation, transcriptional activity decreases sharply  
190 regardless of  $CV_\tau$  (red). **(E)** The sensitivity of transcription repression is quantified by  
191 measuring the time taken for the transcriptional activity to decrease from 90% ( $t_{90}$ ) to 10%  
192 of the maximal transcriptional activity ( $t_{10}$ ). The smaller value of  $t_{10} - t_{90}$  indicates the  
193 sharper repression of transcription. **(F)** Robust oscillations are maintained with bistable  
194 phosphorylation even under noisy cytoplasmic trafficking (i.e., high  $CV_\tau$ ), but not with  
195 linear and ultrasensitive phosphorylations. **(G)** The robustness of the oscillations was  
196 quantified by the correlation time and the relative amplitude of  $R_n$  oscillatory time series.  
197 The longer correlation time indicates the more robust oscillation.  
198

199 **Bistable phosphorylation of PER allows sharp transcriptional repression despite**  
200 **the heterogeneous PER arrival times at the perinucleus.**

201 To investigate whether bistable phosphorylation can filter the heterogeneity in the  
202 protein arrival time ( $t_p$ ), we constructed a mathematical model which describes part of the  
203 TTFL (Figure 1A): the cytoplasmic trafficking of  $R_c$  to  $R_p$ , the phosphorylation of  $R_p$  to  $R'_p$ ,  
204 and the nuclear entry of  $R'_p$  to  $R_n$  (see STAR Methods for detailed model descriptions and  
205 Table S1 for the propensity functions of reactions). To focus on how phosphorylation  
206 affects the distribution of  $t_n$ , we assumed that PER molecules are not degraded.

207 Furthermore, since directly simulating spatiotemporal dynamics during the cytoplasmic  
208 trafficking of thousands of PER molecules is computationally intractable, we describe the  
209 process with a distributed time delay ( $\tau$ )<sup>48-51</sup>. This time delay  $\tau$  is assumed to be gamma-  
210 distributed, which is similar to the distribution of time spent during the cytoplasmic  
211 trafficking of proteins<sup>33</sup>. Note that we used the distributed time delay rather than a fixed  
212 time delay to capture the heterogeneity in the cytoplasmic trafficking of  $R_c$  to  $R_p$ . After the  
213 arrival at the perinucleus,  $R_p$  undergoes phosphorylation with one of the three  
214 phosphorylation mechanisms (Figure 2A) and enters the nucleus. To describe these  
215 different types of phosphorylation, we adopted the modular approach, which describes  
216 complex multistep reactions with a single phenomenological module that qualitatively  
217 describes the dynamical behavior<sup>47,52</sup>. This allowed us to simulate the complex  
218 phosphorylation process, which is a necessary step for nuclear entry (see STAR  
219 Methods). We simulated the situation where 1,000 PER complexes travel from the cell  
220 membrane to the perinucleus using the delayed Gillespie algorithm<sup>53,54</sup>. This allowed us  
221 to calculate the time when each  $R_c$  arrives at the perinucleus ( $t_p$ ) and then when it enters  
222 the nucleus ( $t_n$ ). In this way, we obtained the distribution of  $t_p$  and  $t_n$  of the 1,000 PER  
223 complexes, which quantifies the heterogeneity in the protein arrival time and the nuclear  
224 entry time, respectively.

225         The cytoplasm in which  $R_c$  diffuses can become overcrowded due to various  
226 reasons, such as increased fat deposition, hindering the cytoplasmic trafficking<sup>8-10</sup>. This  
227 leads to noisier cytoplasmic trafficking of PER molecules, and thus they arrive at the  
228 perinucleus in a wider time window. That is, as the coefficient of variation of  $\tau$  ( $CV_\tau$ )  
229 increases, the distribution of  $t_p$  becomes wider (Figure 2B). As a result, the distribution of

230  $t_n$  also becomes wider with linear and ultrasensitive phosphorylations (Figure 2C, green  
231 and blue), and thus transcriptional activity decreases gradually (Figure 2D, green and  
232 blue). However, the narrow distribution of  $t_n$  is maintained with bistable phosphorylation  
233 (Figure 2C, red), and thus transcriptional repression occurs sharply regardless of the  $CV_\tau$   
234 (Figure 2D, red). To quantify the sensitivity of the transcriptional repression (i.e., how  
235 rapidly the transcriptional activity is decreased), the difference between the time when the  
236 transcriptional activity reaches 10% of the maximal transcriptional activity ( $t_{10}$ ) and the  
237 time when the transcriptional activity reaches 90% of the maximal transcriptional activity  
238 ( $t_{90}$ ) was calculated. With bistable phosphorylation,  $t_{10} - t_{90}$  is small (i.e., sharp  
239 repression) regardless of  $CV_\tau$  (Figure 2E). On the other hand, with linear and  
240 ultrasensitive phosphorylations,  $t_{10} - t_{90}$  greatly increases as  $CV_\tau$  increases. This  
241 indicates that bistable phosphorylation, but not linear and ultrasensitive phosphorylations,  
242 allows sharp transcriptional repression even when the cytoplasmic trafficking becomes  
243 noisy.

244

### 245 **Bistable phosphorylation generates robust circadian rhythms even with** 246 **cytoplasmic congestion.**

247 In the previous section, to focus on the cytoplasmic trafficking of  $R_c$ , we used a  
248 model describing part of the TTFL (Figure 1A). Now, we have extended the model to fully  
249 describe the TTFL. Specifically, in the model, the transcriptional activator ( $A$ ) is  
250 suppressed by  $R_n$  via protein sequestration<sup>19,21,22,28</sup>, which closes the negative feedback  
251 loop. Furthermore, the degradations of  $R_c$ ,  $R_p$ ,  $R'_p$ , and  $R_n$  were also incorporated into the  
252 model. With this model, we investigated how the noise level in the cytoplasmic trafficking

253 (i.e.,  $CV_\tau$ ) affects circadian rhythms. As  $CV_\tau$  increases, the simulated oscillations of  $R_n$   
254 become noisy with linear and ultrasensitive phosphorylations (Figure 2F, green and blue).  
255 On the other hand, even when  $CV_\tau$  increases, robust oscillations are maintained with  
256 bistable phosphorylation (Figure 2F, red). To quantify the accuracy and the strength of  
257 the simulated oscillations, we calculated the correlation time and the relative amplitude of  
258 the time series of  $R_n$  (see STAR Methods). The correlation time describes how fast the  
259 autocorrelation function of the oscillatory time series decays<sup>55,56</sup>. If the time series exhibits  
260 a noisy oscillation, autocorrelation will decay rapidly, resulting in a short correlation time.  
261 The correlation time becomes short and relative amplitude becomes small with linear and  
262 ultrasensitive phosphorylations when  $CV_\tau$  increases (Figure 2G, green and blue). On the  
263 other hand, the correlation time is long and the relative amplitude is large regardless of  
264  $CV_\tau$  with bistable phosphorylation (Figure 2G, red). Taken together, with bistable  
265 phosphorylation, robust oscillations can be generated even when  $CV_\tau$  is large due to noisy  
266 cytoplasmic trafficking.

267

### 268 **Bistable phosphorylation reduces the effect of cell size variation on circadian** 269 **periods.**

270 Next, we investigated the effect of cell size variation, which is another source  
271 leading to the variation in the distribution of  $\tau$ , on circadian rhythms. Specifically, mouse  
272 fibroblast cells have highly variable areas (mean  $\pm$  SD,  $2346 \pm 558 \mu m^2$ ; CV=24%) (Figure  
273 3A (i))<sup>57</sup>. Such cell size variation varies the distance of the cytoplasmic trafficking, and  
274 thus it is expected that the mean ( $\mu_\tau$ ) and standard deviation ( $\sigma_\tau$ ) of  $\tau$  changes depending  
275 on the cell size. To explore this, we used a partial differential equation (PDE) that

276 describes the cytoplasmic trafficking of molecules via diffusion toward the perinucleus by  
277 adopting the approach used in a previous study<sup>33</sup>(see Supplemental Information for  
278 details). By simulating the PDE with an experimentally measured diffusion coefficient of  
279 PER molecules ( $D = 0.2\mu\text{m}^2/\text{s}$ )<sup>11,12</sup> and cell sizes<sup>57</sup>, we obtained the probability of having  
280 a PER molecule at each distance from the nucleus and each time. This allowed us to  
281 obtain the probability distribution of the PER arrival time at the perinucleus. In particular,  
282 we found that the mean  $\pm$  SD of  $\mu_\tau$  and  $\sigma_\tau$  are  $5.04 \pm 1.91\text{h}$  and  $4.95 \pm 1.89\text{h}$ , respectively  
283 (Figure 3A (ii), when cell size varies according to  $N(2346\mu\text{m}^2, 558^2\mu\text{m}^4)$  (Figure 3A (i))  
284 (see STAR Methods). Unexpectedly, the standard deviations of both  $\mu_\tau$  and  $\sigma_\tau$  are  $\sim 2\text{h}$ ,  
285 which is about double of the standard deviation of the circadian periods of the mouse  
286 fibroblast cells with different sizes (mean  $\pm$  SD,  $22.97 \pm 0.91\text{h}$ ) (Figure 3A (ii))<sup>57</sup>. This  
287 indicates the presence of filtering mechanisms for the heterogeneous cytoplasmic  
288 trafficking time ( $\tau$ ) to generate similar circadian periods across different cell sizes.

289 To investigate whether bistable phosphorylation can compensate for the effect of  
290 cell size variation, we simulated the TTFL model used in Figures 2F and 2G for cells with  
291 different sizes. Specifically, we varied  $\mu_\tau$  according to  $N(5.04\text{h}, 1.91^2\text{h}^2)$ , whose mean  
292 and SD are obtained from Figure 3A (ii). Furthermore, we set  $\sigma_\tau = 0.5 \times \mu_\tau$ , about half of  
293 those obtained from the PDE simulation ( $\sigma_\tau \approx \mu_\tau$ ), because  $\sigma_\tau \approx \mu_\tau$  leads to too noisy  
294 rhythms with linear and ultrasensitive phosphorylations to analyze their periods and  
295 amplitudes (Figure 2G). As  $\mu_\tau$  and  $\sigma_\tau$  vary due to the cell size change, bistable  
296 phosphorylation leads to a much narrower distribution of periods (SD=2.20h) compared  
297 to linear and ultrasensitive phosphorylations (SD=4.28h and SD=4.31h, respectively)

298 (Figure 3B). Thus, bistable phosphorylation reduces the effect of cell size variation on the  
 299 circadian period.

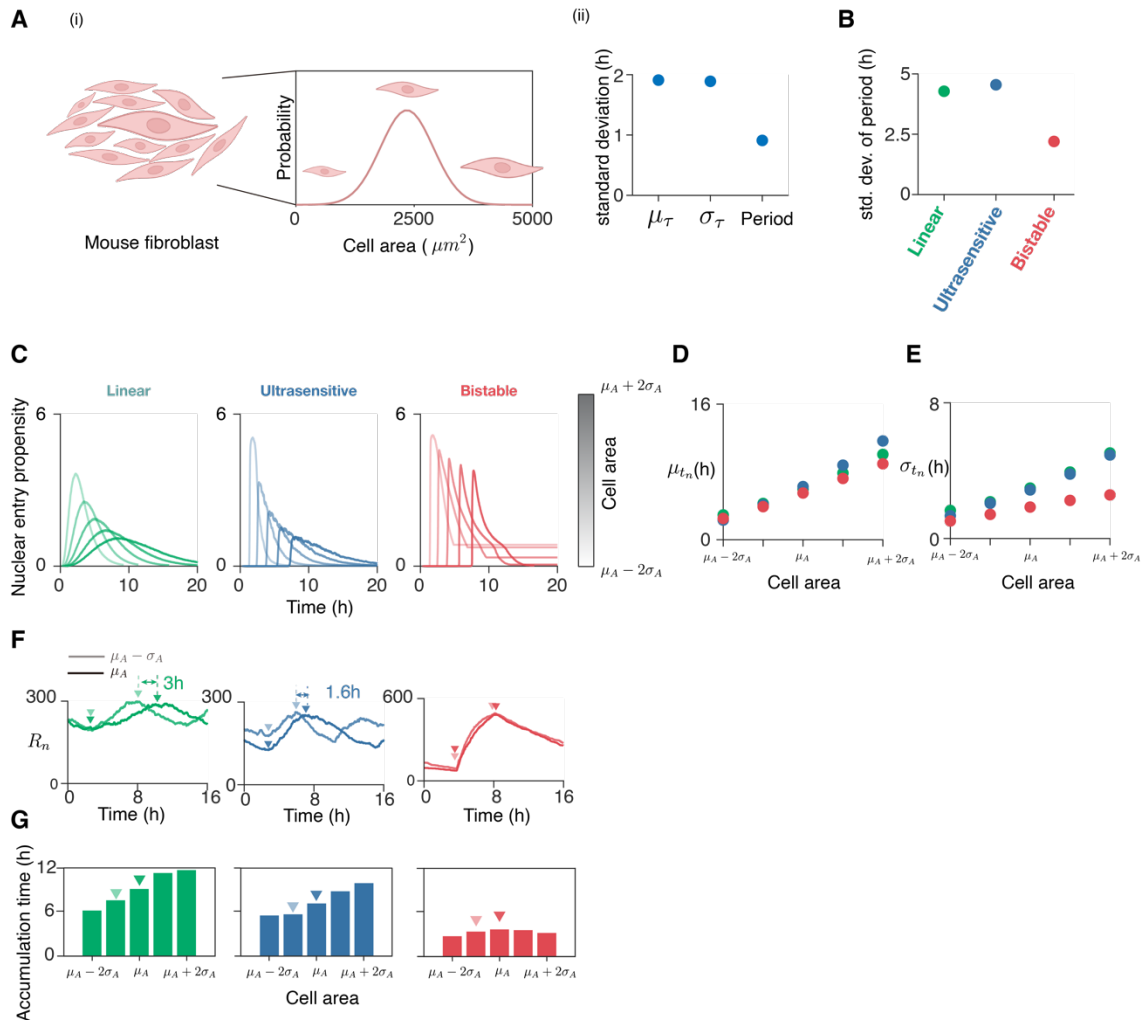

300

301 **Figure 3. Bistable phosphorylation enables cells of different sizes to have similar**  
 302 **periods.** (A) (i) Mouse fibroblast cell size is highly variable, having mean  $\pm$  SD,  $2346 \pm$   
 303  $558 \mu m^2$  (CV=24%)<sup>57</sup>. (ii) For mouse fibroblast cells with different sizes, although the  
 304 standard deviation of the mean ( $\mu_\tau$ ) and the standard deviation ( $\sigma_\tau$ ) of time spent during  
 305 the cytoplasmic trafficking are  $\sim 2$ h, the standard deviation of the circadian periods is only  
 306 a half of them (SD=0.91h). (B) The standard deviation of the simulated circadian periods  
 307 for 1,000 cells, whose areas were sampled from the  $N(2346\mu m^2, 558^2\mu m^4)$ . (C) In a  
 308 larger cell,  $\mu_\tau$  and  $\sigma_\tau$  increase. Thus, the time trajectories of the nuclear entry propensity  
 309 (Tables S1 and S2) are shifted to the right and become wider. Note that with bistable  
 310 phosphorylation, the nuclear entry occurs in a narrow time window, even in larger cells.  
 311 The distributions were obtained with 200 repeated simulations.  $\mu_A$  ( $=2346\mu m^2$ ) and  $\sigma_A$



312 (=558 $\mu\text{m}^2$ ) are the mean and standard deviation of fibroblast cell area, respectively. **(D-**  
313 **E)** While the mean of the nuclear entry time ( $\mu_{t_n}$ ) increases similarly in all three  
314 phosphorylation mechanisms, bistable phosphorylation resulted in a far smaller standard  
315 deviation in nuclear entry time ( $\sigma_{t_n}$ ) than linear and ultrasensitive phosphorylations. **(F-G)**  
316 As a result, the length of time during which  $R_n$  accumulates from the trough (triangle) to  
317 the peak (triangle) of  $R_n$  does not change regardless of cell area with bistable  
318 phosphorylation, but this is not the case with linear and ultrasensitive phosphorylations.  
319

320 **Bistable phosphorylation mitigates the slowed nuclear entry when cell size**  
321 **increases.**

322 We investigated how bistable phosphorylation compensates for the effect of cell  
323 size changes on the circadian period. For this, we used a model describing part of the  
324 TTFL (Figures 2B and 2C) for the five representative cell areas:  $\mu_A - 2\sigma_A$ ,  $\mu_A - \sigma_A$ ,  $\mu_A$ ,  
325  $\mu_A + \sigma_A$ , and  $\mu_A + 2\sigma_A$ , where  $\mu_A$  (=2346 $\mu\text{m}^2$ ) and  $\sigma_A$  (=558 $\mu\text{m}^2$ ) are the mean and  
326 standard deviation of areas of fibroblast cells, respectively (Figure 3A(i)). As the cell size  
327 increases, and thus  $\mu_\tau$  increases, the simulated time trajectories of the nuclear entry  
328 propensity (Tables S1 and S2) are shifted to the right (Figure 3C). Thus, the mean of  
329 nucleus entry time ( $t_n$ ) increases for all three phosphorylation mechanisms (Figure 3D),  
330 which is expected to lengthen the period. Furthermore, as  $\sigma_\tau$  also increases due to the  
331 cell size increase, PER molecules enter the nucleus in a wider time window, and thus the  
332 time trajectories of the nuclear entry propensity become wider and lower. Lower nuclear  
333 entry propensity results in a slow increase in  $R_n$  (Figure 3C), which may further lengthen  
334 the period. Interestingly, such change is much smaller with bistable phosphorylation  
335 compared to linear and ultrasensitive phosphorylation (Figure 3C). That is, the increase  
336 in the standard deviation of  $t_n$  is significantly larger with linear and ultrasensitive  
337 phosphorylations than with bistable phosphorylation (Figure 3E). As a result, when the



338 TTFL model was simulated for each phosphorylation mechanism, the time between the  
339 minimum of  $R_n$  and the maximum of  $R_n$  became longer (i.e.,  $R_n$  accumulated more slowly)  
340 in a larger cell with linear and ultrasensitive phosphorylations, but not with bistable  
341 phosphorylation (Figure 3F). Specifically, the mean length of time during which  $R_n$   
342 increased more than two-fold change varied from ~4h to ~10h as the cell area increased  
343 from  $\mu_A - 2\sigma_A$  ( $=1229 \mu m^2$ ) to  $\mu_A + 2\sigma_A$  ( $=3462 \mu m^2$ ) with linear and ultrasensitive  
344 phosphorylations (Figure 3G, green and blue). On the other hand, with bistable  
345 phosphorylation, the accumulation time of  $R_n$  was nearly the same regardless of the cell  
346 area (Figure 3G, red). This explains why the change in the circadian period due to the  
347 cell size variation is smaller with bistable phosphorylation than with other phosphorylation  
348 mechanisms (Figure 3B).

349

### 350 **Bistable phosphorylation enables robust circadian rhythms despite noisy activator** 351 **rhythms.**

352 In the previous sections, the amount of activator protein was assumed to be  
353 constant over time. However, the amount of activator molecules, such as BMAL1,  
354 oscillates with a period of ~24h<sup>13,14,35,58</sup> (Figure 4A). In addition, the amplitude and the  
355 peak-to-peak period of BMAL1 protein fluctuate from day to day. Specifically, the  
356 amplitude and the peak-to-peak period of experimentally measured BMAL1 proteins in a  
357 single cell highly vary<sup>14</sup>:  $286 \pm 35$  and  $25.4 \pm 5.7$ h (Figure 4A). Furthermore, an additional  
358 'bump' often exists between the peaks. Due to the noisy pattern, it is expected that the  
359 synthesis timing of PER will be heterogeneous, resulting in the heterogeneous protein  
360 arrival time distribution. We investigated whether bistable phosphorylation enables robust

361 circadian rhythms of PER even under such fluctuation in activators, resulting in noisy  
362 transcription of PER. For this, we simulated the TTFL model (Figure 1A), where the  
363 activator level changes according to the experimentally measured BMAL1 (Figure 4A).  
364 The amplitude of oscillation is highly variable with linear and ultrasensitive  
365 phosphorylations (Figure 4B, green and blue). Furthermore, additional peaks in the  
366 nuclear PER complex ( $R_n$ ) are observed with linear and ultrasensitive phosphorylations.  
367 In contrast, with bistable phosphorylation, robust rhythms with similar amplitudes are  
368 generated (Figure 4B, red). Moreover, the additional peaks do not appear. As a result,  
369 the CV of the peak-to-peak period and the amplitude are much smaller with bistable  
370 phosphorylation than with linear and ultrasensitive phosphorylations (Figure 4C). Taken  
371 together, bistable phosphorylation enables robust circadian rhythms despite fluctuation in  
372 activator rhythms.

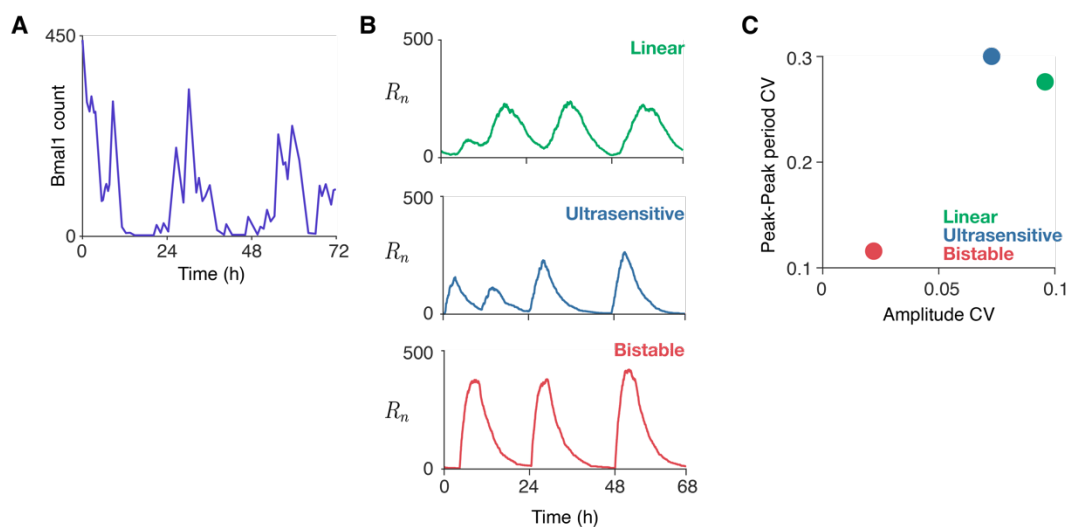

373  
374 **Figure 4. Bistable phosphorylation enables cells to sustain robust circadian**  
375 **rhythms even under noisy activator rhythms. (A)** The level of activator protein BMAL1  
376 fluctuates across a day and exhibits daily change. In addition, an additional bump often  
377 exists, resulting in more than one peak during a single cycle. The graph was retrieved

378 from Blanchoud et al.<sup>14</sup>. **(B)** Even with such noisy activator time series, bistable  
379 phosphorylation leads to robust rhythms, unlike linear and ultrasensitive phosphorylations.  
380 **(C)** As a result, the CV of both the peak-to-peak period and the amplitudes is small with  
381 bistable phosphorylation, but not with linear and ultrasensitive phosphorylation.  
382

## 383 **Discussion**

384 For the TTFL to generate robust circadian rhythms, precise nucleus entry of the PER  
385 complex is critical<sup>7-10</sup>. However, the distribution of the PER complex arrival time at the  
386 perinuclear region is highly heterogeneous due to various noise sources. Despite this,  
387 precise nucleus entry of the PER complex and transcriptional repression occur in the  
388 circadian clock. To investigate the molecular mechanism underlying the unexpected  
389 precision of the circadian clock, we constructed a mathematical model describing the  
390 effect of protein arrival time on circadian rhythms (Figure 1A). We found that when the  
391 protein arrival time varies due to the change of cytoplasmic congestion level, cell size,  
392 and activator level, bistable phosphorylation, but not linear and ultrasensitive  
393 phosphorylations, leads to precise repression timing, and thus robust circadian rhythms  
394 (Figures 2-4). This indicates that the bistable phosphoswitch is the key mechanism to  
395 filter the spatiotemporal noise in the cell to generate circadian rhythms. The  
396 spatiotemporally regulated bistable phosphorylation can also play a critical role in other  
397 biological oscillators, such as the cell cycle<sup>59-61</sup>.

398 The mathematical model used in our study describes the spatiotemporal dynamics of  
399 the TTFL of the circadian clock. In previous studies, the spatiotemporal dynamics of  
400 molecules from the cytoplasm to the nucleus were directly described using PDE<sup>33</sup> or  
401 agent-based models<sup>8,32</sup>. This approach was computationally expensive and not flexible  
402 to describe the various noise sources for the protein arrival time of molecules to the

403 perinucleus. To describe the spatiotemporal dynamics of molecules simply and flexibly,  
404 we used a delay distribution, which was previously used to describe a chain of signaling  
405 processes or protein synthesis<sup>48-50</sup>. Furthermore, it is challenging to model ultrasensitive  
406 and bistable phosphorylations since they are generated from complex combinations of  
407 multiple reactions. To resolve this, we utilized a modular approach that describes those  
408 complex multistep reactions with a phenomenological module, which was developed in  
409 work by De Boeck et al.<sup>47</sup>. This allowed us to effectively capture the key dynamics of the  
410 phosphorylation mechanisms without comprehensively modeling the underlying complex  
411 reactions. The time delay distribution and the modular approach are effective tools for  
412 describing complex intracellular spatiotemporal dynamics.

413         The bistable phosphoswitch regulates the nuclear entry of PER. Specifically, it  
414 allows PER molecules to enter the nucleus after phosphorylation only when the local  
415 concentration of PER in the perinucleus reaches a certain level, rather than entering the  
416 nucleus in the order in which molecules arrive near the nucleus<sup>8</sup>. This type of regulation  
417 of nuclear entry could also play an important role in biological systems other than the  
418 circadian clock. For example, in pancreatic  $\beta$ -cells, the nuclear entry of cPKA should be  
419 slow to distinguish the time scales of external signals<sup>62</sup>. However, the underlying  
420 molecular mechanisms of such slow nuclear entry have not been known. The bistable  
421 phosphoswitch could be a potential molecular mechanism leading to such regulation of  
422 cPKA in pancreatic  $\beta$ -cells.

423         Alzheimer's disease (AD) has been reported to disrupt the circadian clock<sup>63</sup>. Such  
424 distribution appears to be due to tauopathy, which triggers the formation of neurofibrillary  
425 tangles, and thus increases cytoplasmic crowdedness<sup>8</sup>. However, even though tauopathy

426 is one of the earliest events in AD development<sup>64</sup>, the activity rhythms of mild symptomatic  
427 dementia patients are not significantly different from those of non-patients<sup>65,66</sup>. This can  
428 be explained by our results: the bistable phosphoswitch allows the circadian rhythms to  
429 function normally up to a reasonable increase in intracellular congestion level.

430

## 431 **Limitations of the study**

432 In this work, we utilized an extension of the Gillespie algorithm to simulate the system  
433 describing the TTFL. This allowed us to describe the effects of various noise sources on  
434 circadian rhythms. To use the Gillespie algorithm for a system containing non-elementary  
435 propensity functions (e.g., Hill functions) other than functions from mass-action kinetics,  
436 timescale separation is necessary<sup>67-69</sup>. Thus, we assumed that the synthesis and the  
437 degradation of PER are slower than other reactions, such as binding and unbinding of  
438 PER to activator proteins and each step of its phosphorylation and dephosphorylation.  
439 However, timescale separation is often not enough for accurate stochastic simulations,  
440 unlike deterministic simulations; i.e., the condition for using the non-elementary  
441 propensity functions for stochastic simulation is stricter than the deterministic  
442 simulations<sup>68,70-72</sup>. Furthermore, the validity of using non-elementary propensity functions  
443 for stochastic simulations in the presence of distributed delays has not been investigated,  
444 which will be interesting in future work.

445 Cell size keeps changing due to cell growth or cell division, which affects the TTFL of  
446 the circadian clock. Specifically, as cell size changes, the cytoplasmic trafficking of PER  
447 molecules changes, which is investigated in our study by using a time delay distribution  
448 (Figures 3B-3G). However, we did not investigate other critical factors, such as the

449 dilution of the PER molecules during cell growth and their partition into daughter cells  
450 after cell division<sup>73-75</sup>. It would be interesting in future work to extend our study to  
451 incorporate dilution due to cell growth and the partition of molecules after cell division to  
452 investigate further the effect of the cell size changes on circadian rhythms.

453

## 454 **Acknowledgements**

455 This work was supported by the Human Frontiers Science Program Organization (grant  
456 no. RGY0063/2017) (J.K.K.), the Institute for Basic Science (grant no. IBS-R029-C3)  
457 (J.K.K.), the Korea University Grant (S.L.) and the National Research Foundation of  
458 Korea (NRF) grant funded by the Korea government (MSIP) (No.  
459 2020R1A2C1A01100114) (S.L).

460

## 461 **Author contributions**

462 All authors designed the study. S.J.C. performed and D.W.K., S.L. and J.K.K. contributed  
463 to computational modeling and simulation. All authors analyzed the data. J.K.K.  
464 supervised the project. S.J.C. and J.K.K. wrote the draft of the manuscript, and all authors  
465 revised the manuscript.

466

## 467 **Declaration of interests**

468 The authors declare no competing interests.

469

## 470 **STAR★Methods**

## 471 **RESOURCE AVAILABILITY**

### 472 **Lead contact**

473 Further information and requests for resources and reagents should be directed to and  
474 will be fulfilled by the Lead Contact, Jae Kyoung Kim (jaekkim@kaist.ac.kr).

### 475 **Materials availability**

476 This study did not generate new unique reagents.

### 477 **Data and code availability**

- 478 - This paper analyzes publicly available existing data. These accession numbers for  
479 the datasets are listed in the key resources table.
- 480 - The MATLAB codes of the computational package are available in the following  
481 Database: The link will be available upon acceptance of the manuscript.
- 482 - Any additional information required to analyze the data is available from the lead  
483 contact upon request.

484

## 485 **METHODS DETAILS**

### 486 **The stochastic model of the circadian clock simulating the TTFL with the** 487 **spatiotemporal behavior of PER proteins.**

488 We extended a previous mathematical model of the mammalian circadian  
489 clock<sup>19,21,22,28</sup> to study the influence of the spatiotemporal behavior of PER proteins on  
490 circadian rhythms (see Tables S1 and S2 for detailed reactions and parameters used in  
491 the simulation). Specifically, our model consists of four variables: PER protein in the  
492 peripheral cytoplasm ( $R_c$ ), unphosphorylated PER complex in the perinucleus ( $R_p$ ),

493 phosphorylated PER complex in the perinucleus ( $R'_p$ ), and PER complex in the nucleus  
494 ( $R_n$ ), which degrade with the same rate constant of  $\lambda_d$ .

495 In the model,  $R_c$  is synthesized at the rate of  $\lambda_p \max\left(1 - \frac{R_n}{A}, 0\right)$ , where  $A$  is the  
496 number of activator proteins and  $\lambda_p$  is the maximum synthesis rate. The synthesis rate is  
497 proportional to the fraction of free activator that is not sequestered by PER complex in  
498 the nucleus, described by  $\max\left(1 - \frac{R_n}{A}, 0\right)$ . This is an approximated form of the quasi-  
499 steady state of the fraction of free activators found by applying the total quasi-steady state  
500 approximation reduction to the detailed model describing the circadian clock<sup>19,21,22,28</sup>  
501 under the assumption that PER quickly binds and unbinds to the activator:

502  $\frac{A - R_n - K_d \Omega + \sqrt{(A - R_n - K_d \Omega)^2 + 4 A K_d \Omega}}{2A}$ , where  $K_d$  is the dissociation constant between the activator

503 and PER, and  $\Omega$  is the volume of the system. Then, by further assuming that the binding  
504 is tight ( $K_d \rightarrow 0$ ), the fraction of free activator can be approximated by  $\max\left(1 - \frac{R_n}{A}, 0\right)$ <sup>19,21,22,28</sup>. Up to Figure 3,  $A$  was fixed to be 300, assuming the number of the activator

506 is constant over time to focus on the spatiotemporal dynamics of PER. In Figure 4, to  
507 investigate whether bistable phosphorylation enables robust circadian rhythms even  
508 under noisy activator rhythms, we changed  $A$  according to the experimentally measured  
509 time series of BMAL1 molecules in a single cell<sup>14</sup>. From 72h-long experimentally  
510 measured BMAL1 data, the first four hours were excluded to avoid the effect of the initial  
511 shock for the experiment and then repeated to generate a long time series of  $A$ . Since the  
512 experimentally measured BMAL1 time series was discrete, we linearly interpolated the  
513 data to obtain the amount of BMAL1 in continuous time.



514 After being synthesized,  $R_c$  passes through the cytoplasm crowded with obstacles  
515 during a gamma-distributed time delay  $\tau$ . Specifically, when each  $R_c$  molecule is  
516 produced,  $\tau$  is sampled from the gamma distribution and assigned to each molecule. Here,  
517 the gamma distribution is utilized because it successfully captures the distribution of time  
518 spent during the cytoplasmic trafficking<sup>33</sup>. To determine the shape of the gamma  
519 distribution, we utilized a previously proposed method using the PDE model, which  
520 describes the cytoplasmic trafficking<sup>33</sup>, so that the mean and the standard deviation of  $\tau$   
521 can be obtained (see Supplemental Information for details). When the experimentally  
522 measured diffusion coefficient of PER of  $0.2\mu m^2/s$ <sup>11,12</sup> and the mean area of the fibroblast  
523 cell of  $2346\mu m^2$  were used, the PDE simulation resulted in  $\mu_\tau=4.9h$ . This value of  $\mu_\tau$  was  
524 used in Figure 2 and Figure 4.  $\sigma_\tau$  was set to be  $\sigma_\tau = 0.5 \cdot \mu_\tau$  to ensure linear and  
525 ultrasensitive phosphorylations to generate oscillations.

526 The PER complex that arrives at the perinucleus ( $R_p$ ) undergoes phosphorylation  
527 to be  $R'_p$ . Then,  $R'_p$  is either dephosphorylated to  $R_p$  with the rate of  $\frac{1}{\tau_p}$  or enters the  
528 nucleus with the rate of  $\lambda_n$ . To simply describe the phosphorylation based on multiple  
529 reactions, we adopted the modular approach<sup>47</sup>, which treated the phosphorylation  
530 reaction as a single phenomenological module. That is, the module takes the total amount  
531 of PER complex in the perinucleus ( $T = R_p + R'_p$ ) as the input and gives the fraction of  
532 the  $R'_p$  in the perinucleus as the output. Among possible responses that the module can  
533 generate, we chose linear phosphorylation, ultrasensitive phosphorylation, and bistable  
534 phosphorylation<sup>52</sup>. With linear phosphorylation, the fraction of  $R'_p$  ( $=\frac{R'_p}{T}$ ) is constant  
535 regardless of  $T$  (Figure 2A, green). Such response is obtained by utilizing the propensity

536 function for the phosphorylation  $f(T) = \frac{c \cdot T}{\tau_p}$ , where  $c$  is between 0 and 1. In our simulation,  
537 the time scale of phosphorylation and dephosphorylation reactions,  $\tau_p$ , was set to be  
538 sufficiently short ( $\tau_p = \frac{1}{60}$ h) so that the phosphorylation and dephosphorylation quickly  
539 equilibrate (i.e.,  $\frac{c \cdot T}{\tau_p} = \frac{R'_p}{\tau_p}$ ). As a result, the fraction of  $R'_p$  equilibrates to  $\frac{R'_p}{T} = c$ . Here,  $c =$   
540 0.7 was chosen to make the fraction of  $R'_p$  be 70%. For ultrasensitive phosphorylation, the  
541 fraction of  $R'_p$  monotonically increases as  $T$  increases, with a steep increase near the  
542 threshold. To describe ultrasensitive phosphorylation, the propensity function  $f(T) =$   
543  $\frac{1}{\tau_p} \left( \frac{T^{n+1}}{T^n + K_u^n} \right)$  was used. Thus, the fraction of  $R'_p$  ( $\frac{R'_p}{T}$ ) quickly equilibrates to  $\frac{T^n}{T^n + K_u^n}$ , which was  
544 used to describe the ultrasensitive response previously<sup>44,47</sup>. We set  $K_u = 400$  and  $n = 70$   
545 to obtain a steep increase in the fraction of  $R'_p$  when  $T$  reaches 400 (Figure 2A, blue). For  
546 bistable phosphorylation, the response is bifurcating (i.e., the response qualitatively  
547 varies depending on variables other than  $T$ ), being affected by  $R'_p$ . Thus, the response of  
548 bistable phosphorylation is described not only by  $T$ , but also by  $R'_p$ . To describe bistable  
549 phosphorylation, we used an implicit function  $f(T, R'_p) = \frac{1}{\tau_p} \left( \frac{T^{m+1}}{T^m + \max(0.125 \cdot K_b, K_b - 5 \cdot R'_p)^m} \right)$   
550 after modifying a function generating an S-shaped response curve (i.e., bistable  
551 response)<sup>47</sup>.  $\frac{R'_p}{T}$  quickly equilibrates to  $\frac{T^m}{T^m + \max(0.125 \cdot K_b, K_b - 5 \cdot R'_p)^m}$ , which steeply increases  
552 when  $T$  increases to reach the switch-on threshold,  $K_b$ . Once  $T$  reaches  $K_b$ , the fraction  
553 of  $R'_p$  stays near one even though  $T$  decreases below  $K_b$  until it reaches the switch-off  
554 threshold, which is about  $\frac{K_b}{8}$ . Here, we chose  $m = 30$  and  $K_b = 400$  (Figure 2A, red).

555 The model was simulated using the delayed Gillespie algorithm<sup>53,54</sup>. For the  
556 Gillespie simulation, the volume of the system was set to 1. See Tables S1 and S2 for  
557 detailed descriptions of propensity functions and parameters used in the simulation,  
558 respectively. In Figures 2B-2E and Figures 3C-3E, to focus on how the phosphorylation  
559 affects the distribution of  $t_n$ , the synthesis of  $R_c$  and the degradation of PER molecules  
560 are excluded from the simulation. Specifically, we set  $\lambda_p$  and  $\lambda_d$  to be 0 to make these  
561 reactions not occur. The initial condition was given by  $R_c = 1000$ ,  $R_p = R'_p = R_n = 0$ .

562

## 563 **QUANTIFICATIONS AND STATISTICAL ANALYSIS**

### 564 **Quantification of features of the oscillation.**

565 We calculated several features (e.g., period, amplitude, correlation time) from the  
566 oscillatory time series. First, in Figure 2G, we calculated the correlation time<sup>55,56</sup> and the  
567 relative amplitude<sup>31</sup>, as done in previous studies. Specifically, to calculate the correlation  
568 time, we estimated parameters  $\tau_c$  and  $P$  by fitting  $DC(s) = \exp\left(-\frac{s}{\tau_c}\right) \cdot \cos\left(\frac{2\pi s}{P}\right)$  to the  
569 autocorrelation function  $C(s) = \frac{\langle(x(t+s)-\langle x \rangle)(x(t)-\langle x \rangle)\rangle_s}{\langle x^2 \rangle - \langle x \rangle^2}$  where  $x(t)$  is the  $R_n$  time series  
570 obtained from the simulation. Then, the correlation time is defined as  $\tau_c$ , and it describes  
571 how fast the autocorrelation decays over time. Thus, a more robust oscillation has a larger  
572  $\tau_c$ . The relative amplitude was calculated as the fraction of the amplitude (i.e., the  
573 difference between the peak height and trough height of the given rhythms) to the peak  
574 height. To calculate the correlation time and the relative amplitude, the  $R_n$  time series  
575 obtained from the simulation for 100 days (i.e., 2,400h) was used after the first 10 days  
576 were excluded to avoid the effect of transient dynamics. We repeated ten simulations with

577 the same initial condition of having no PER molecule in the cell. Then, we took the  
578 average correlation time over ten repetitions.

579 In Figure 3B, we calculated the period of the oscillation by fitting the  $C(s)$  to  $DC(s)$   
580 for simulated time series of  $R_n$  for 100 days after excluding first 10 transient days. Then,  
581 we used the estimated  $P$  as the period. We repeated this over ten different simulated  
582 trajectories and used the average of the estimated  $P$  as the period.

583 To calculate the accumulation time of  $R_n$  in Figure 3G and the peak-to-peak period  
584 in Figure 4, the time series of  $R_n$  simulated for 100 days after excluding first 10 transient  
585 days was used. Then, the accumulation time of  $R_n$  was measured from each cycle over  
586 10 repeated simulations and then the mean of  $R_n$  accumulation time was calculated. The  
587 peak-to-peak period was measured from each cycle over 10 repeated simulations, and  
588 then CV was calculated (Figure 4).

589

## 590 KEY RESOURCE TABLE

| REAGENT or RESOURCE             | SOURCE                         | IDENTIFIER                                                                                                                                                    |
|---------------------------------|--------------------------------|---------------------------------------------------------------------------------------------------------------------------------------------------------------|
| Software and algorithms         |                                |                                                                                                                                                               |
| MATLAB R2021b                   | MathWorks                      | <a href="https://mathworks.com">https://mathworks.com</a> ;<br>RRID:SCR_001622                                                                                |
| Others                          |                                |                                                                                                                                                               |
| Mouse fibroblast cell size data | Li et al. <sup>57</sup>        | <a href="https://www.pnas.org/doi/full/10.1073/pnas.1922388117">https://www.pnas.org/doi/full/10.1073/pnas.1922388117</a>                                     |
| BMAL1 time series data          | Blanchoud et al. <sup>14</sup> | <a href="https://www.sciencedirect.com/science/article/abs/pii/S104620231500170X">https://www.sciencedirect.com/science/article/abs/pii/S104620231500170X</a> |

591

## 592 References

- 593 1. Reppert, S.M., and Weaver, D.R. (2001). Molecular analysis of mammalian circadian  
594 rhythms. *Annu Rev Physiol* 63, 647-676.  
595 <https://doi.org/10.1146/annurev.physiol.63.1.647>.
- 596 2. Ueda, H.R., Chen, W., Adachi, A., Wakamatsu, H., Hayashi, S., Takasugi, T., Nagano,  
597 M., Nakahama, K., Suzuki, Y., Sugano, S., et al. (2002). A transcription factor response  
598 element for gene expression during circadian night. *Nature* 418, 534-539.  
599 [10.1038/nature00906](https://doi.org/10.1038/nature00906).
- 600 3. Gallego, M., and Virshup, D.M. (2007). Post-translational modifications regulate the  
601 ticking of the circadian clock. *Nat Rev Mol Cell Biol* 8, 139-148.  
602 <https://doi.org/10.1038/nrm2106>.
- 603 4. Takahashi, J.S. (2017). Transcriptional architecture of the mammalian circadian clock.  
604 *Nat Rev Genet* 18, 164-179. <https://doi.org/10.1038/nrg.2016.150>.
- 605 5. Honma, S. (2018). The mammalian circadian system: a hierarchical multi-oscillator  
606 structure for generating circadian rhythm. *J Physiol Sci* 68, 207-219.  
607 <https://doi.org/10.1007/s12576-018-0597-5>.
- 608 6. Cao, X., Yang, Y., Selby, C.P., Liu, Z., and Sancar, A. (2021). Molecular mechanism of  
609 the repressive phase of the mammalian circadian clock. *Proc Natl Acad Sci U S A* 118.  
610 <https://doi.org/10.1073/pnas.2021174118>.
- 611 7. Tamanini, F., Yagita, K., Okamura, H., and van der Horst, G.T.J. (2005).  
612 Nucleocytoplasmic Shuttling of Clock Proteins. In *Methods in Enzymology*, M.W. Young,  
613 ed. (Academic Press), pp. 418-435. [https://doi.org/10.1016/S0076-6879\(05\)93020-6](https://doi.org/10.1016/S0076-6879(05)93020-6).
- 614 8. Beesley, S., Kim, D.W., D'Alessandro, M., Jin, Y., Lee, K., Joo, H., Young, Y., Tomko,  
615 R.J., Faulkner, J., Gamsby, J., et al. (2020). Wake-sleep cycles are severely disrupted  
616 by diseases affecting cytoplasmic homeostasis. *Proceedings of the National Academy of*  
617 *Sciences* 117, 28402-28411. <https://doi.org/10.1073/pnas.2003524117>.
- 618 9. Hurley, J.M. (2020). Cytoplasmic traffic jams affect circadian timing. *Science*  
619 *Translational Medicine* 12, eabf4681. <https://doi.org/10.1126/scitranslmed.abf4681>.
- 620 10. Montague-Cardoso, K. (2020). Sleep-wake cycles are disrupted by diseases that result  
621 in cytoplasmic crowding. *Communications Biology* 3, 705.  
622 <https://doi.org/10.1038/s42003-020-01445-8>.
- 623 11. Smyllie, N.J., Pilorz, V., Boyd, J., Meng, Q.J., Saer, B., Chesham, J.E., Maywood, E.S.,  
624 Krogager, T.P., Spiller, D.G., Boot-Handford, R., et al. (2016). Visualizing and  
625 Quantifying Intracellular Behavior and Abundance of the Core Circadian Clock Protein  
626 PERIOD2. *Curr Biol* 26, 1880-1886. <https://doi.org/10.1016/j.cub.2016.05.018>.
- 627 12. Koch, A.A., Bagnall, J.S., Smyllie, N.J., Begley, N., Adamson, A.D., Fribourgh, J.L.,  
628 Spiller, D.G., Meng, Q.-J., Partch, C.L., Strimmer, K., et al. (2022). Quantification of  
629 protein abundance and interaction defines a mechanism for operation of the circadian  
630 clock. *eLife* 11, e73976. <https://doi.org/10.7554/eLife.73976>.
- 631 13. Suter, D.M., Molina, N., Gatfield, D., Schneider, K., Schibler, U., and Naef, F. (2011).  
632 Mammalian genes are transcribed with widely different bursting kinetics. *Science* 332,  
633 472-474. <https://doi.org/10.1126/science.1198817>.
- 634 14. Blanchoud, S., Nicolas, D., Zoller, B., Tidin, O., and Naef, F. (2015). CAST: An  
635 automated segmentation and tracking tool for the analysis of transcriptional kinetics from  
636 single-cell time-lapse recordings. *Methods* 85, 3-11.  
637 <https://doi.org/10.1016/j.ymeth.2015.04.023>.
- 638 15. Goldbeter, A. (1995). A model for circadian oscillations in the *Drosophila* period protein  
639 (PER). *Proc Biol Sci* 261, 319-324. <https://doi.org/10.1098/rspb.1995.0153>.

- 640 16. Tyson, J.J., Hong, C.I., Thron, C.D., and Novak, B. (1999). A simple model of circadian  
641 rhythms based on dimerization and proteolysis of PER and TIM. *Biophys J* 77, 2411-  
642 2417. [https://doi.org/10.1016/S0006-3495\(99\)77078-5](https://doi.org/10.1016/S0006-3495(99)77078-5).
- 643 17. Forger, D.B., and Peskin, C.S. (2003). A detailed predictive model of the mammalian  
644 circadian clock. *Proc Natl Acad Sci U S A* 100, 14806-14811.  
645 <https://doi.org/10.1073/pnas.2036281100>.
- 646 18. Leloup, J.C., and Goldbeter, A. (2003). Toward a detailed computational model for the  
647 mammalian circadian clock. *Proc Natl Acad Sci U S A* 100, 7051-7056.  
648 <https://doi.org/10.1073/pnas.1132112100>.
- 649 19. Kim, J.K., and Forger, D.B. (2012). A mechanism for robust circadian timekeeping via  
650 stoichiometric balance. *Mol Syst Biol* 8, 630. <https://doi.org/10.1038/msb.2012.62>.
- 651 20. Jolley, C.C., Ukai-Tadenuma, M., Perrin, D., and Ueda, H.R. (2014). A mammalian  
652 circadian clock model incorporating daytime expression elements. *Biophys J* 107, 1462-  
653 1473. [10.1016/j.bpj.2014.07.022](https://doi.org/10.1016/j.bpj.2014.07.022).
- 654 21. Kim, J.K., Kilpatrick, Z.P., Bennett, M.R., and Josic, K. (2014). Molecular mechanisms  
655 that regulate the coupled period of the mammalian circadian clock. *Biophys J* 106, 2071-  
656 2081. <https://doi.org/10.1016/j.bpj.2014.02.039>.
- 657 22. Kim, J.K. (2016). Protein sequestration versus Hill-type repression in circadian clock  
658 models. *IET Syst Biol* 10, 125-135. <https://doi.org/10.1049/iet-syb.2015.0090>.
- 659 23. Wang, Y., Ni, X., Yan, J., and Yang, L. (2017). Modeling transcriptional co-regulation of  
660 mammalian circadian clock. *Math Biosci Eng* 14, 1447-1462.  
661 <https://doi.org/10.3934/mbe.2017075>.
- 662 24. Abel, J.H., Chakrabarty, A., Klerman, E.B., and Doyle, F.J., 3rd (2019). Pharmaceutical-  
663 based entrainment of circadian phase via nonlinear model predictive control. *Automatica*  
664 (Oxf) 100, 336-348. <https://doi.org/10.1016/j.automatica.2018.11.012>.
- 665 25. Del Olmo, M., Kramer, A., and Herzog, H. (2019). A Robust Model for Circadian Redox  
666 Oscillations. *Int J Mol Sci* 20. <https://doi.org/10.3390/ijms20092368>.
- 667 26. Kim, D.W., Chang, C., Chen, X., Doran, A.C., Gaudreault, F., Wager, T., DeMarco, G.J.,  
668 and Kim, J.K. (2019). Systems approach reveals photosensitivity and PER2 level as  
669 determinants of clock-modulator efficacy. *Mol Syst Biol* 15, e8838.  
670 <https://doi.org/10.15252/msb.20198838>.
- 671 27. Breitenbach, T., Helfrich-Forster, C., and Dandekar, T. (2021). An effective model of  
672 endogenous clocks and external stimuli determining circadian rhythms. *Sci Rep* 11,  
673 16165. <https://doi.org/10.1038/s41598-021-95391-y>.
- 674 28. Kim, J.K. (2021). Tick, Tock, Circadian Clocks. In *Case Studies in Systems Biology*, P.  
675 Kraikivski, ed. (Springer International Publishing), pp. 79-94. [https://doi.org/10.1007/978-3-030-67742-8\\_6](https://doi.org/10.1007/978-3-030-67742-8_6).
- 677 29. Kim, R., and Reed, M.C. (2021). A mathematical model of circadian rhythms and  
678 dopamine. *Theor Biol Med Model* 18, 8. <https://doi.org/10.1186/s12976-021-00139-w>.
- 679 30. Mosig, R.A., Castaneda, A.N., Deslauriers, J.C., Frazier, L.P., He, K.L., Maghzian, N.,  
680 Pokharel, A., Schrier, C.T., Zhu, L., Koike, N., et al. (2021). Natural antisense transcript  
681 of *Period2*, *Per2AS*, regulates the amplitude of the mouse circadian clock. *Genes Dev*  
682 35, 899-913. <https://doi.org/10.1101/gad.343541.120>.
- 683 31. Jeong, E.M., Kwon, M., Cho, E., Lee, S.H., Kim, H., Kim, E.Y., and Kim, J.K. (2022).  
684 Systematic modeling-driven experiments identify distinct molecular clockworks  
685 underlying hierarchically organized pacemaker neurons. *Proceedings of the National*  
686 *Academy of Sciences* 119, e2113403119. <https://doi.org/doi:10.1073/pnas.2113403119>.
- 687 32. Sturrock, M., Hellander, A., Matzavinos, A., and Chaplain, M.A. (2013). Spatial  
688 stochastic modelling of the *Hes1* gene regulatory network: intrinsic noise can explain  
689 heterogeneity in embryonic stem cell differentiation. *J R Soc Interface* 10, 20120988.  
690 <https://doi.org/10.1098/rsif.2012.0988>.



- 691 33. Ma, J., Do, M., Le Gros, M.A., Peskin, C.S., Larabell, C.A., Mori, Y., and Isaacson, S.A.  
692 (2020). Strong intracellular signal inactivation produces sharper and more robust  
693 signaling from cell membrane to nucleus. *PLoS Computational Biology* 16, e1008356.  
694 <https://doi.org/10.1371/journal.pcbi.1008356>.
- 695 34. Chen, W., Smeekens, J.M., and Wu, R. (2016). Systematic study of the dynamics and  
696 half-lives of newly synthesized proteins in human cells. *Chem Sci* 7, 1393-1400.  
697 <https://doi.org/10.1039/c5sc03826j>.
- 698 35. Lee, C., Etchegaray, J.P., Cagampang, F.R., Loudon, A.S., and Reppert, S.M. (2001).  
699 Posttranslational mechanisms regulate the mammalian circadian clock. *Cell* 107, 855-  
700 867. [https://doi.org/10.1016/s0092-8674\(01\)00610-9](https://doi.org/10.1016/s0092-8674(01)00610-9).
- 701 36. Isojima, Y., Nakajima, M., Ukai, H., Fujishima, H., Yamada, R.G., Masumoto, K.H.,  
702 Kiuchi, R., Ishida, M., Ukai-Tadenuma, M., Minami, Y., et al. (2009). CKIepsilon/delta-  
703 dependent phosphorylation is a temperature-insensitive, period-determining process in  
704 the mammalian circadian clock. *Proc Natl Acad Sci U S A* 106, 15744-15749.  
705 [10.1073/pnas.0908733106](https://doi.org/10.1073/pnas.0908733106).
- 706 37. Zhou, M., Kim, J.K., Eng, G.W., Forger, D.B., and Virshup, D.M. (2015). A Period2  
707 Phosphoswitch Regulates and Temperature Compensates Circadian Period. *Mol Cell*  
708 60, 77-88. <https://doi.org/10.1016/j.molcel.2015.08.022>.
- 709 38. Narasimamurthy, R., Hunt, S.R., Lu, Y., Fustin, J.M., Okamura, H., Partch, C.L., Forger,  
710 D.B., Kim, J.K., and Virshup, D.M. (2018). CK1delta/epsilon protein kinase primes the  
711 PER2 circadian phosphoswitch. *Proc Natl Acad Sci U S A* 115, 5986-5991.  
712 <https://doi.org/10.1073/pnas.1721076115>.
- 713 39. Masuda, S., Narasimamurthy, R., Yoshitane, H., Kim, J.K., Fukada, Y., and Virshup,  
714 D.M. (2020). Mutation of a PER2 phosphodegron perturbs the circadian phosphoswitch.  
715 *Proc Natl Acad Sci U S A* 117, 10888-10896. <https://doi.org/10.1073/pnas.2000266117>.
- 716 40. Gabriel, C.H., Del Olmo, M., Zehtabian, A., Jager, M., Reischl, S., van Dijk, H., Ulbricht,  
717 C., Rakhymzhan, A., Korte, T., Koller, B., et al. (2021). Live-cell imaging of circadian  
718 clock protein dynamics in CRISPR-generated knock-in cells. *Nat Commun* 12, 3796.  
719 <https://doi.org/10.1038/s41467-021-24086-9>.
- 720 41. Smyllie, N.J., Bagnall, J., Koch, A.A., Niranjana, D., Polidarova, L., Chesham, J.E., Chin,  
721 J.W., Partch, C.L., Loudon, A.S.I., and Hastings, M.H. (2022). Cryptochrome proteins  
722 regulate the circadian intracellular behavior and localization of PER2 in mouse  
723 suprachiasmatic nucleus neurons. *Proc Natl Acad Sci U S A* 119.  
724 <https://doi.org/10.1073/pnas.2113845119>.
- 725 42. Novak, B., and Tyson, J.J. (2008). Design principles of biochemical oscillators. *Nat Rev*  
726 *Mol Cell Biol* 9, 981-991. <https://doi.org/10.1038/nrm2530>.
- 727 43. Ferrell, James E., Jr., Tsai, Tony Y.-C., and Yang, Q. (2011). Modeling the Cell Cycle:  
728 Why Do Certain Circuits Oscillate? *Cell* 144, 874-885. [10.1016/j.cell.2011.03.006](https://doi.org/10.1016/j.cell.2011.03.006).
- 729 44. Ferrell, J.E., Jr., and Ha, S.H. (2014). Ultrasensitivity part II: multisite phosphorylation,  
730 stoichiometric inhibitors, and positive feedback. *Trends Biochem Sci* 39, 556-569.  
731 <https://doi.org/10.1016/j.tibs.2014.09.003>.
- 732 45. Lee, H., Chen, R., Lee, Y., Yoo, S., and Lee, C. (2009). Essential roles of CKIdelta and  
733 CKIepsilon in the mammalian circadian clock. *Proc Natl Acad Sci U S A* 106, 21359-  
734 21364. <https://doi.org/10.1073/pnas.0906651106>.
- 735 46. Narasimamurthy, R., and Virshup, D.M. (2021). The phosphorylation switch that  
736 regulates ticking of the circadian clock. *Molecular Cell* 81, 1133-1146.  
737 <https://doi.org/10.1016/j.molcel.2021.01.006>.
- 738 47. De Boeck, J., Rombouts, J., and Gelens, L. (2021). A modular approach for modeling  
739 the cell cycle based on functional response curves. *PLoS Comput Biol* 17, e1009008.  
740 <https://doi.org/10.1371/journal.pcbi.1009008>.

- 741 48. Barrio, M., Leier, A., and Marquez-Lago, T.T. (2013). Reduction of chemical reaction  
742 networks through delay distributions. *J Chem Phys* 138, 104114.  
743 <https://doi.org/10.1063/1.4793982>.
- 744 49. Park, S.J., Song, S., Yang, G.S., Kim, P.M., Yoon, S., Kim, J.H., and Sung, J. (2018).  
745 The Chemical Fluctuation Theorem governing gene expression. *Nat Commun* 9, 297.  
746 <https://doi.org/10.1038/s41467-017-02737-0>.
- 747 50. Choi, B., Cheng, Y.Y., Cinar, S., Ott, W., Bennett, M.R., Josic, K., and Kim, J.K. (2020).  
748 Bayesian inference of distributed time delay in transcriptional and translational  
749 regulation. *Bioinformatics* 36, 586-593. <https://doi.org/10.1093/bioinformatics/btz574>.
- 750 51. Kim, D.W., Hong, H., and Kim, J.K. (2022). Systematic inference identifies a major  
751 source of heterogeneity in cell signaling dynamics: The rate-limiting step number. *Sci*  
752 *Adv* 8. <https://doi.org/10.1126/sciadv.abl4598>.
- 753 52. Tyson, J.J., and Novak, B. (2020). A Dynamical Paradigm for Molecular Cell Biology.  
754 *Trends Cell Biol* 30, 504-515. <https://doi.org/10.1016/j.tcb.2020.04.002>.
- 755 53. Cai, X. (2007). Exact stochastic simulation of coupled chemical reactions with delays. *J*  
756 *Chem Phys* 126, 124108. <https://doi.org/10.1063/1.2710253>.
- 757 54. Josic, K., Lopez, J.M., Ott, W., Shiao, L., and Bennett, M.R. (2011). Stochastic delay  
758 accelerates signaling in gene networks. *PLoS Comput Biol* 7, e1002264.  
759 <https://doi.org/10.1371/journal.pcbi.1002264>.
- 760 55. Cao, Y., Wang, H., Ouyang, Q., and Tu, Y. (2015). The free energy cost of accurate  
761 biochemical oscillations. *Nat Phys* 11, 772-778. <https://doi.org/10.1038/nphys3412>.
- 762 56. Qiao, L., Zhang, Z.-B., Zhao, W., Wei, P., and Zhang, L. (2021). Network design  
763 principle for robust oscillatory behaviors with respect to biological noise. *bioRxiv*,  
764 2021.2012.2022.473835. <https://doi.org/10.1101/2021.12.22.473835>.
- 765 57. Li, Y., Shan, Y., Desai, R.V., Cox, K.H., Weinberger, L.S., and Takahashi, J.S. (2020).  
766 Noise-driven cellular heterogeneity in circadian periodicity. *Proc Natl Acad Sci U S A*  
767 117, 10350-10356. <https://doi.org/10.1073/pnas.1922388117>.
- 768 58. Abe, Y.O., Yoshitane, H., Kim, D.W., Kawakami, S., Koebis, M., Nakao, K., Aiba, A.,  
769 Kim, J.K., and Fukada, Y. (2022). Rhythmic transcription of *Bmal1* stabilizes the  
770 circadian timekeeping system in mammals. *Nat Commun* 13, 4652.  
771 <https://doi.org/10.1038/s41467-022-32326-9>.
- 772 59. Gelens, L., Qian, J., Bollen, M., and Saurin, A.T. (2018). The Importance of Kinase-  
773 Phosphatase Integration: Lessons from Mitosis. *Trends Cell Biol* 28, 6-21.  
774 [10.1016/j.tcb.2017.09.005](https://doi.org/10.1016/j.tcb.2017.09.005).
- 775 60. Jin, M., Tavella, F., Wang, S., and Yang, Q. (2022). In vitro cell cycle oscillations exhibit  
776 a robust and hysteretic response to changes in cytoplasmic density. *Proc Natl Acad Sci*  
777 *U S A* 119. [10.1073/pnas.2109547119](https://doi.org/10.1073/pnas.2109547119).
- 778 61. Nomura, M., and Okada-Hatakeyama, M. (2013). Phase responses of oscillating  
779 components in a signaling pathway. *Front Physiol* 4, 68. [10.3389/fphys.2013.00068](https://doi.org/10.3389/fphys.2013.00068).
- 780 62. Peercy, B.E., and Sherman, A.S. (2010). How Pancreatic  $\beta$ -Cells Discriminate Long and  
781 Short Timescale cAMP Signals. *Biophysical Journal* 99, 398-406.  
782 <https://doi.org/10.1016/j.bpj.2010.04.043>.
- 783 63. Stevanovic, K., Yunus, A., Joly-Amado, A., Gordon, M., Morgan, D., Gulick, D., and  
784 Gamsby, J. (2017). Disruption of normal circadian clock function in a mouse model of  
785 tauopathy. *Exp Neurol* 294, 58-67. <https://doi.org/10.1016/j.expneurol.2017.04.015>.
- 786 64. Mondragon-Rodriguez, S., Perry, G., Luna-Munoz, J., Acevedo-Aquino, M.C., and  
787 Williams, S. (2014). Phosphorylation of tau protein at sites Ser(396-404) is one of the  
788 earliest events in Alzheimer's disease and Down syndrome. *Neuropathol Appl Neurobiol*  
789 40, 121-135. <https://doi.org/10.1111/nan.12084>.
- 790 65. Hatfield, C.F., Herbert, J., van Someren, E.J., Hodges, J.R., and Hastings, M.H. (2004).  
791 Disrupted daily activity/rest cycles in relation to daily cortisol rhythms of home-dwelling



- 792 patients with early Alzheimer's dementia. *Brain* 127, 1061-1074.  
793 <https://doi.org/10.1093/brain/awh129>.
- 794 66. Musiek, E.S. (2017). Circadian Rhythms in AD pathogenesis: A Critical Appraisal. *Curr*  
795 *Sleep Med Rep* 3, 85-92. <https://doi.org/10.1007/s40675-017-0072-5>.
- 796 67. Kim, J.K., Josić, K., and Bennett, M.R. (2015). The relationship between stochastic and  
797 deterministic quasi-steady state approximations. *BMC Systems Biology* 9, 87.  
798 <https://doi.org/10.1186/s12918-015-0218-3>.
- 799 68. Song, Y.M., Hong, H., and Kim, J.K. (2021). Universally valid reduction of multiscale  
800 stochastic biochemical systems using simple non-elementary propensities. *PLoS*  
801 *Comput Biol* 17, e1008952. <https://doi.org/10.1371/journal.pcbi.1008952>.
- 802 69. Kim, J.K., and Tyson, J.J. (2020). Misuse of the Michaelis-Menten rate law for protein  
803 interaction networks and its remedy. *PLoS Comput Biol* 16, e1008258.  
804 <https://doi.org/10.1371/journal.pcbi.1008258>.
- 805 70. Thomas, P., Straube, A.V., and Grima, R. (2012). The slow-scale linear noise  
806 approximation: an accurate, reduced stochastic description of biochemical networks  
807 under timescale separation conditions. *BMC Syst Biol* 6, 39.  
808 <https://doi.org/10.1186/1752-0509-6-39>.
- 809 71. Kim, J.K., Josić, K., and Bennett, M.R. (2014). The Validity of Quasi-Steady-State  
810 Approximations in Discrete Stochastic Simulations. *Biophysical Journal* 107, 783-793.  
811 <https://doi.org/10.1016/j.bpj.2014.06.012>.
- 812 72. Kim, J.K., and Sontag, E.D. (2017). Reduction of multiscale stochastic biochemical  
813 reaction networks using exact moment derivation. *PLoS Comput Biol* 13, e1005571.  
814 <https://doi.org/10.1371/journal.pcbi.1005571>.
- 815 73. Gonze, D. (2013). Modeling the effect of cell division on genetic oscillators. *Journal of*  
816 *Theoretical Biology* 325, 22-33. <https://doi.org/10.1016/j.jtbi.2013.02.001>.
- 817 74. Veliz-Cuba, A., Hirning, A.J., Atanas, A.A., Hussain, F., Vancia, F., Josić, K., and  
818 Bennett, M.R. (2015). Sources of Variability in a Synthetic Gene Oscillator. *PLOS*  
819 *Computational Biology* 11, e1004674. <https://doi.org/10.1371/journal.pcbi.1004674>.
- 820 75. Paijmans, J., Lubensky, D.K., and Rein Ten Wolde, P. (2017). Robustness of synthetic  
821 oscillators in growing and dividing cells. *Phys Rev E* 95, 052403.  
822 <https://doi.org/10.1103/PhysRevE.95.052403>.
